# Supplementary material for: Rational fabrication of an anionic zinc carboxylate framework as a fluorescent probe for 2,6-pyridinedicarboxylic acid
Source: Royal Society of Chemistry journal article supplement (doi:10.1039/d4dt02529f), 2024-10-31
Supplement: d4dt02529f1.pdf [file d4dt02529f1.pdf]

## Supporting Information

### Rational Fabrication of Anionic Zinc Carboxylate Framework as Fluorescent Probe of 2,6-Pyridinedicarboxylic Acid

Hui-Hui Xie, Hao Yu, Xiuling Xu\* and Si-Fu Tang\*

College of Chemistry and Pharmaceutical Sciences, Qingdao Agricultural University,  
Changcheng Road 700, Chengyang District, Qingdao 266109, China.

\*Corresponding author: [tangsf@qau.edu.cn](mailto:tangsf@qau.edu.cn).

#### Instruments and methods

Polycrystalline X-ray diffraction (PXRD) patterns were collected on Bruker D8 Advance diffractometer using CuK $\alpha$  radiation. Solution  $^1\text{H}$  NMR spectrum was recorded on a Bruker AVANCE-III NMR (600 MHz). UV-Visible adsorption spectra were recorded on UV-3900 (HITACHI). The fluorescence measurements were carried out on a fluorescence spectrometer (F-7000, HITACHI). Thermogravimetric analyses (TGA) were performed on a simultaneous thermal analyzer (SDT650) at a heating rate of 10 °C/min under an N $_2$  atmosphere. Nitrogen adsorption desorption isotherms were analyzed using a surface area and porosimetry system (Kubo-X1000, BIAODE) at 77 K. The samples were pretreated by degassing at 100 °C for 5 h. IR spectra were recorded in the range of 4000-550 cm $^{-1}$  using a FTIR spectrometer (Nicolet iS10). X-ray photoelectron spectroscopy (XPS) was performed on a VG ESCALABMK II spectrometer using a 2 Al K $\alpha$  (1486.6 eV) photon source. Scanning electron microscopy (SEM) images were taken on EOL JSM-IT500. ICP-OES measurements were carried out on an optical emission spectrometer (OPTMA8000DV, PE).

#### Single-Crystal Structure Determination

The diffraction intensity data were collected on a Bruker SMART APEX II CCD diffractometer (Mo K $\alpha$  radiation,  $\lambda = 0.71073$  Å) at room temperature. SAINT was used for integration of intensity of reflections and scaling.<sup>1</sup> Absorption corrections were carried out with the program SADABS.<sup>2</sup> Crystal structures were solved by direct

methods using SHELXS.<sup>3</sup> Subsequent difference Fourier analyses and least squares refinement with SHELXL-2013 allowed for the location of the atom positions.<sup>4</sup> All non-hydrogen atoms were refined with anisotropic thermal parameters. The hydrogen atoms on the water molecules were located from the difference Fourier map. All hydrogen atoms were refined using a riding model. The crystallographic details are summarized in Table 1. The data have been deposited in the Cambridge Crystallographic Data Centre (CCDC), deposition number CCDC 2377451 for compound TTCA-Zn. These data can be obtained free of charge via [www.ccdc.cam.ac.uk/data\\_request/cif](http://www.ccdc.cam.ac.uk/data_request/cif), or by emailing [data\\_request@ccdc.cam.ac.uk](mailto:data_request@ccdc.cam.ac.uk), or by contacting The Cambridge Crystallographic Data Centre, 12, Union Road, Cambridge CB2 1EZ, UK; fax: +44 1223336033.

Table S1. Selected bond lengths (Å) and bond angles (°).

|                     |          |                     |          |
|---------------------|----------|---------------------|----------|
| Zn(1)-O(3)#1        | 1.933(4) | Zn(2)-O(4)#3        | 2.059(6) |
| Zn(1)-O(1)          | 1.946(5) | Zn(2)-O(4)#4        | 2.059(6) |
| Zn(1)-O(5)          | 1.971(3) | Zn(2)-O(4)          | 2.059(6) |
| Zn(1)-O(6)          | 1.973(5) | Zn(2)-O(5)#5        | 2.112(5) |
| Zn(2)-O(4)#2        | 2.059(6) | Zn(2)-O(5)#6        | 2.112(5) |
| O(3)#1-Zn(1)-O(1)   | 124.0(2) | O(4)#4-Zn(2)-O(4)   | 92.0(4)  |
| O(3)#1-Zn(1)-O(5)   | 108.6(2) | O(4)#2-Zn(2)-O(5)#5 | 86.0(2)  |
| O(1)-Zn(1)-O(5)     | 107.2(2) | O(4)#3-Zn(2)-O(5)#5 | 94.0(2)  |
| O(3)#1-Zn(1)-O(6)   | 103.7(2) | O(4)#4-Zn(2)-O(5)#5 | 86.0(2)  |
| O(1)-Zn(1)-O(6)     | 104.2(2) | O(4)-Zn(2)-O(5)#5   | 94.0(2)  |
| O(5)-Zn(1)-O(6)     | 108.1(2) | O(4)#2-Zn(2)-O(5)#6 | 94.0(2)  |
| O(4)#2-Zn(2)-O(4)#3 | 92.0(4)  | O(4)#3-Zn(2)-O(5)#6 | 86.0(2)  |
| O(4)#2-Zn(2)-O(4)#4 | 88.0(4)  | O(4)#4-Zn(2)-O(5)#6 | 94.0(2)  |
| O(4)#3-Zn(2)-O(4)#4 | 180.0    | O(4)-Zn(2)-O(5)#6   | 86.0(2)  |
| O(4)#2-Zn(2)-O(4)   | 180.0(3) | O(5)#5-Zn(2)-O(5)#6 | 180.0    |
| O(4)#3-Zn(2)-O(4)   | 88.0(4)  |                     |          |

Symmetry transformations used to generate equivalent atoms: #1 x, y+1/2, -z+5/2; #2 -x, -y, -z+3; #3 -x, y, z; #4 x, -y, -z+3; #5 x, y-1/2, -z+5/2; #6 -x, -y+1/2, z+1/2.

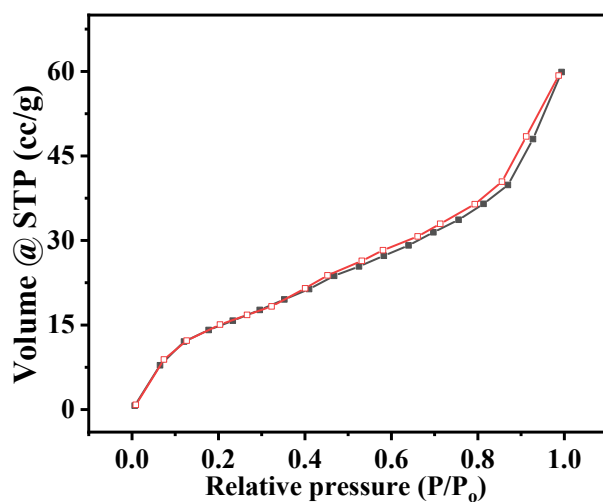

Figure S1. N<sub>2</sub> adsorption-desorption isotherms of TTCA-Zn.

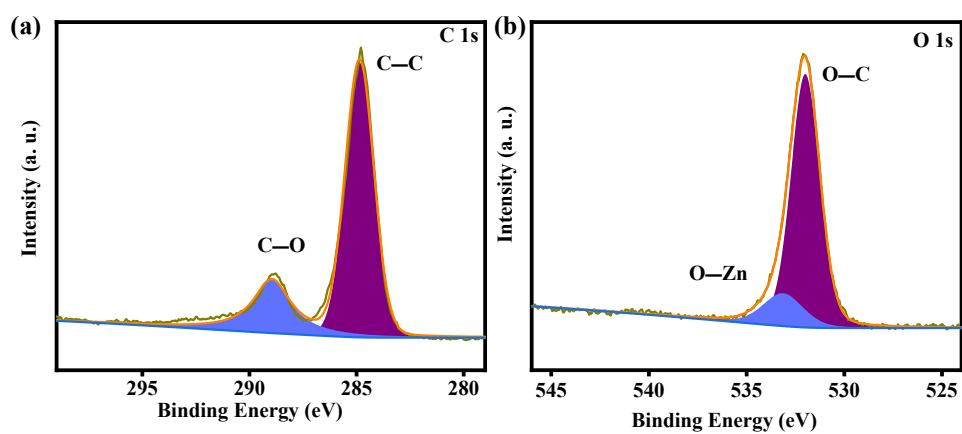

Figure S2. XPS C1s and O1s spectra of TTCA-Zn.

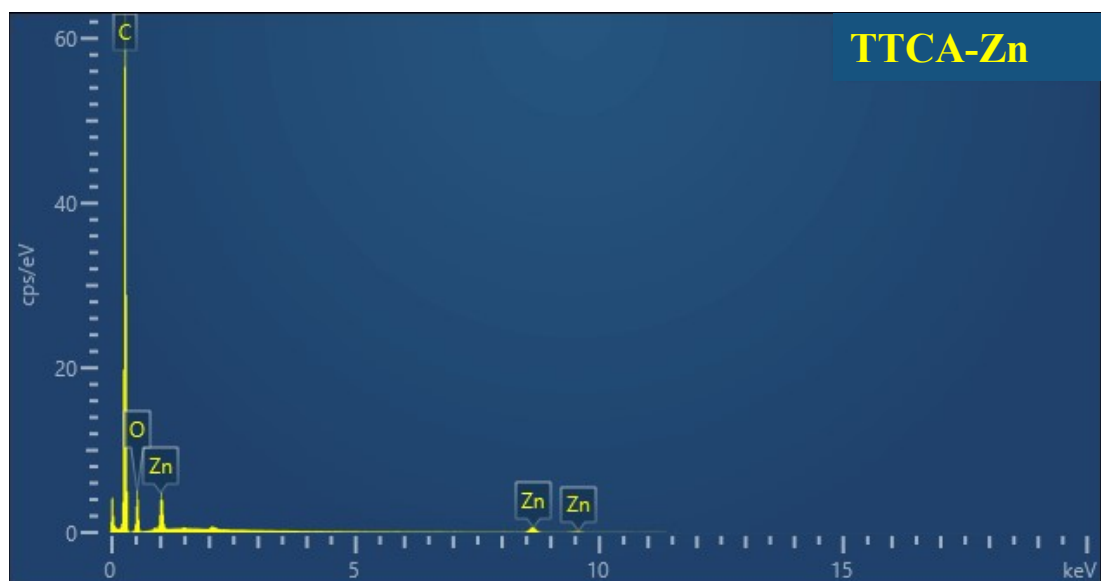

Figure S3. EDX spectrum of TTCA-Zn.

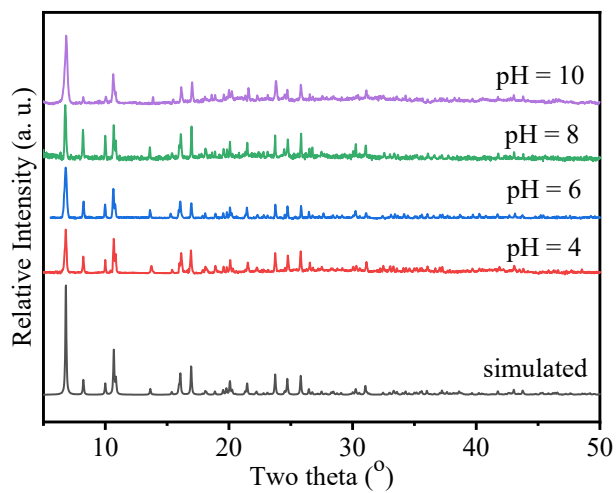

Figure S4. XRD patterns of TTCA-Zn recovered from solutions of different pH values.

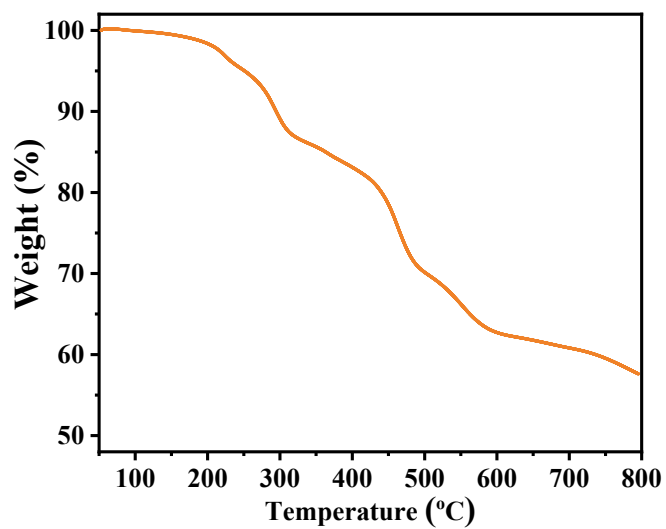

Figure S5. TGA curves of as-prepared TTCA-Zn.

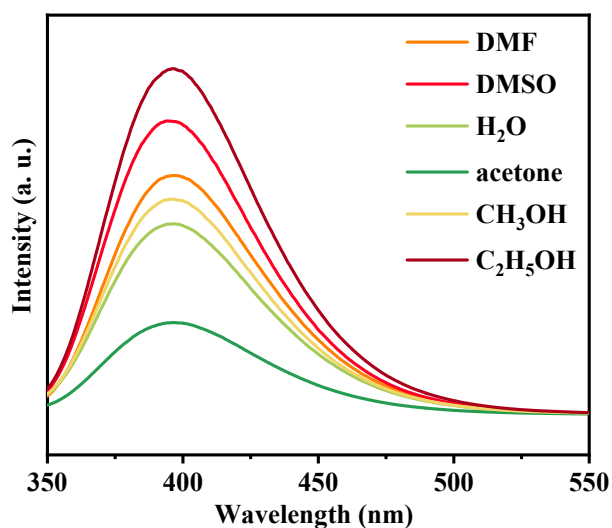

Figure S6. Emission spectra of TTCA-Zn in different solvents (2 mg TTCA-Zn dispersed in 2 mL of solvent).

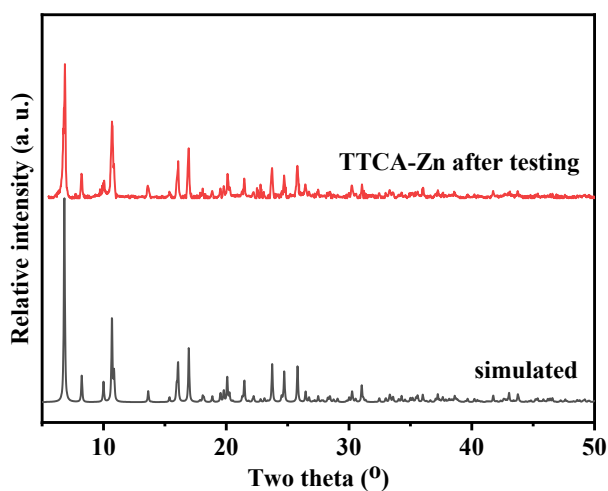

Figure S7. Comparison of the XRD patterns of simulated and TTCA-Zn after testing.

Table S2. The Zn content of TTCA-Zn and the recovered sample tested by ICP-OES.

| probe                                       | theoretic concentration of Zn (mg/L) | experimental concentration of Zn (mg/L) |
|---------------------------------------------|--------------------------------------|-----------------------------------------|
| TTCA-Zn                                     | 97.774                               | 92.056                                  |
| TTCA-Zn (in the supernatants after sensing) | --                                   | 1.679                                   |

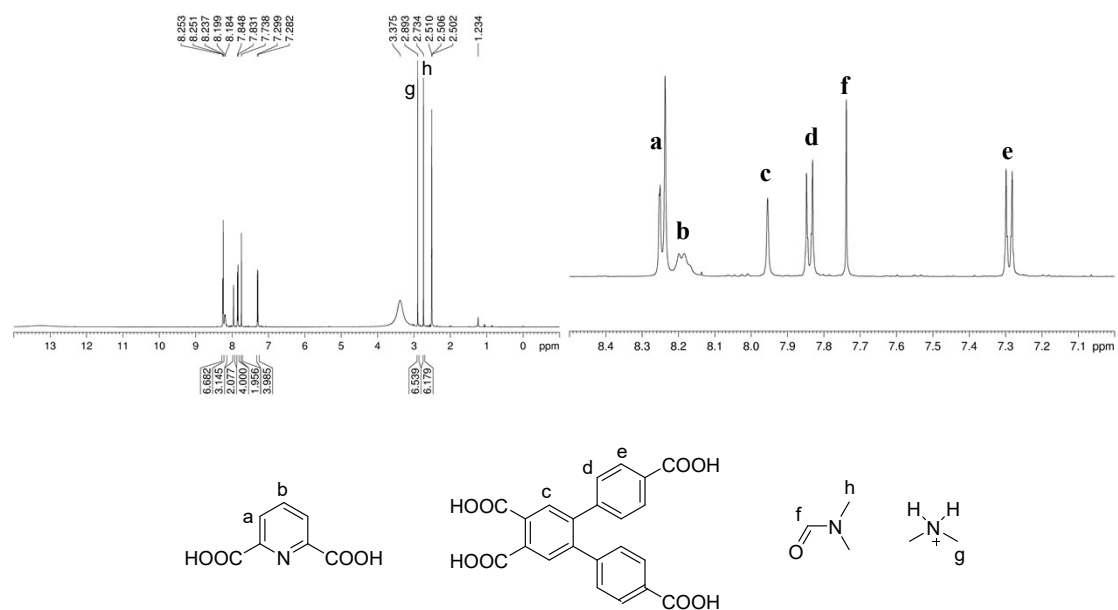

Figure S8.  $^1\text{H}$ NMR spectra of the suspension in  $\text{D}_6$ -DMSO.

Ten milligrammes of powdered TTCA-Zn was added to 2 mL of  $\text{D}_6$ -DMSO and sonicated for 1 min. Afterward, 10 mg of DPA was added and sonicated for additional 1 min to form a homogeneous solution. The solution was then filtered with syringe filter ( $0.22\ \mu\text{m}$ ) and the  $^1\text{H}$ NMR spectrum was recorded.

## REFERENCES

- (1) SAINT, Version 6.45; Bruker Analytical X-ray Systems Inc.: 2003.
- (2) G. M. Sheldrick. SADABS, Version 2.10; Bruker AXS Inc.: Madison, WI, 2003.
- (3) G. M. Sheldrick. SHELXS-97, Program for Crystal Structure Solution and Refinement; University of Göttingen, 1997.
- (4) G. M. Sheldrick. SHELXL 2013, University of Göttingen, 2013.
